# Supplementary material
Source: Springer Nature journal article supplement (https://www.springermedizin.de/resource/supplementary/12933_2005_38_MOESM10_ESM.pdf/9539486)

VOC

Epineurium

Neuronal  
Unit

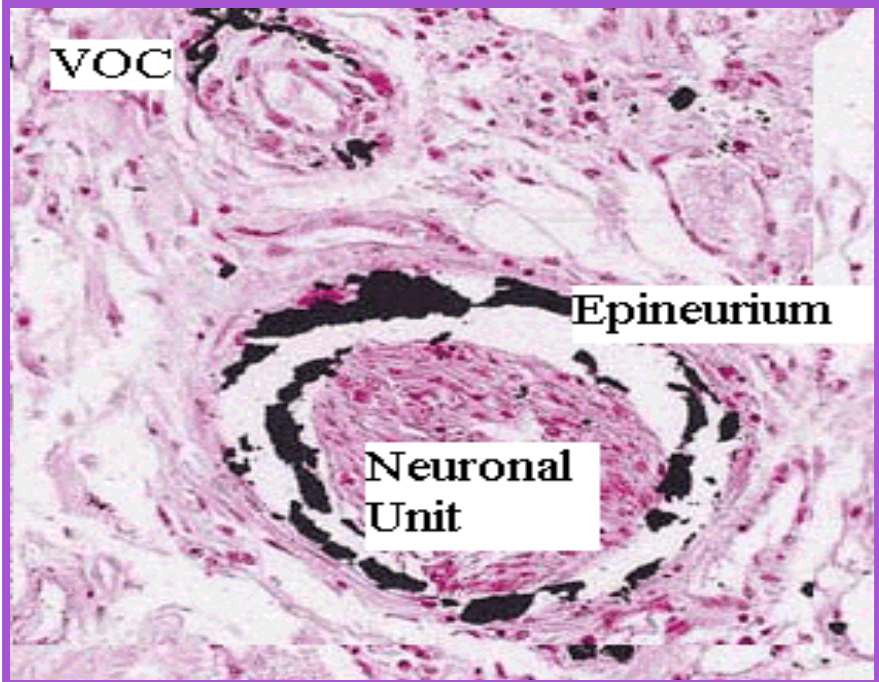

Supplement: MOESM10 [file 9539486]
